# Supplementary material for: Conjunction of factors triggering waves of seasonal influenza
Source: eLife journal article supplement (doi:10.7554/elife.30756), 2018-02-26

## A Analysis scheme & Corroborated Conclusions

Putative county-specific predictors of influenza onset: temporal and spatial autocorrelations of infection incidence and data on human travel

data

conclusions

causality streamlines

init. at shores

south shores

south-eastern shores

predictive factors

causal subset

short-range travel  
>  
long-range travel

Approach 1: Non-parametric Granger analysis of county-specific incidence

Approach 2: Poisson regression on putative factors

Approach 3: County-matching causal analysis on weather, demographic, socio-economic triggers

## B CDC vs Truven prev. (LOESS fit)

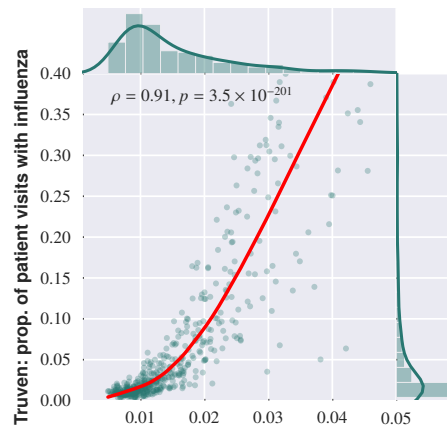

CDC: prop. of patient with influenza

## C Non-parametric Granger Causality Coefficient vs Linear Regression Coefficient

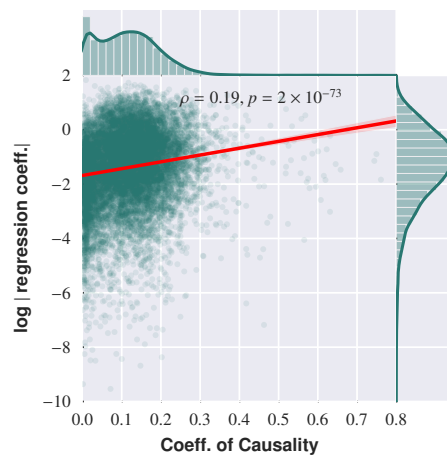

Supplement: supp [file elife_poa_e30756_Figure_1_figure_supplement_1.pdf › elife_poa_e30756_Figure_1_figure_supplement_1.pdf]
