# Supplementary material for: Conjunction of factors triggering waves of seasonal influenza
Source: eLife journal article supplement (doi:10.7554/elife.30756), 2018-02-26

## A Inferred coefficients with significances (DIC:191252)

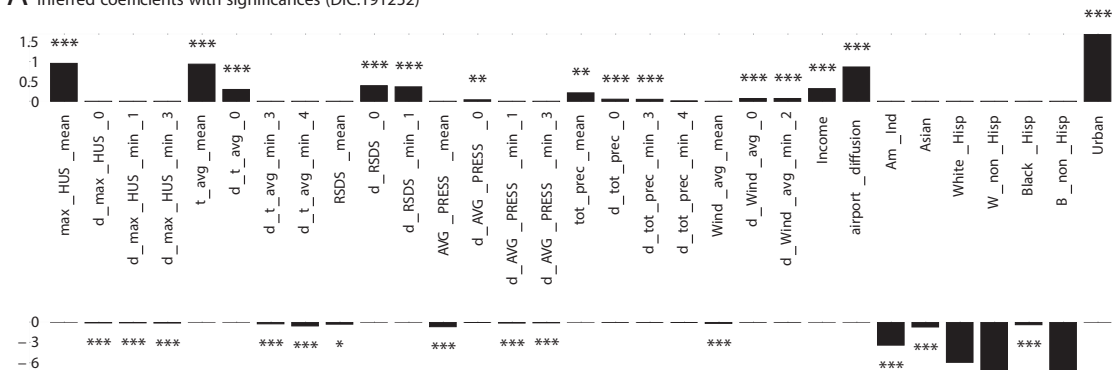

## B Inferred coefficients with significances (DIC:191376)

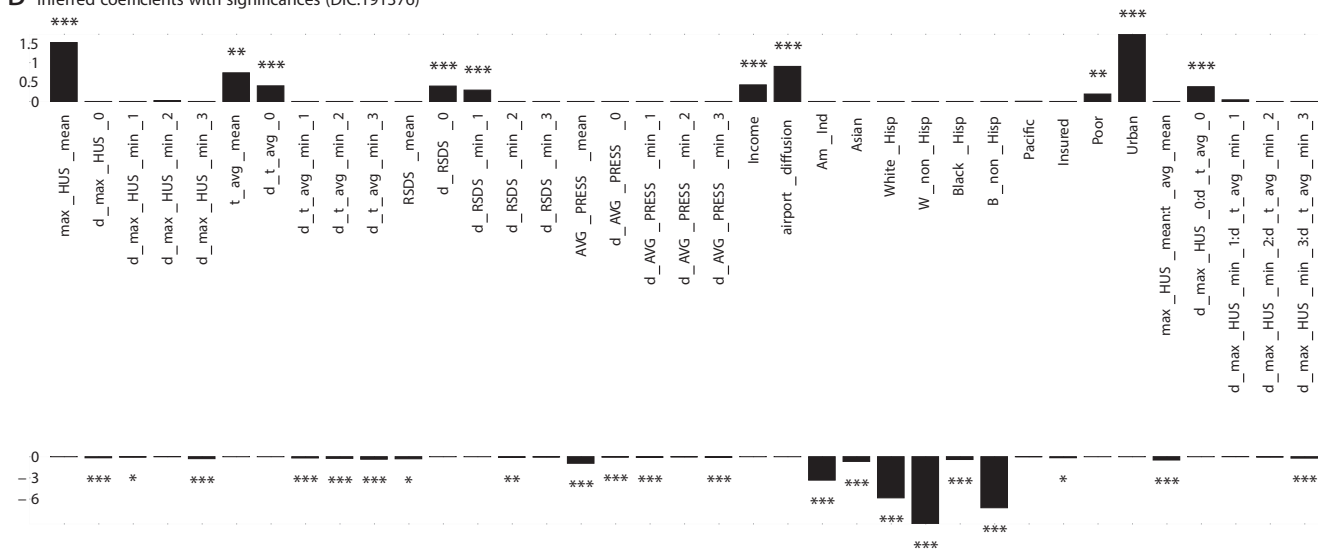

## C Inferred coefficients with significances (DIC:191513)

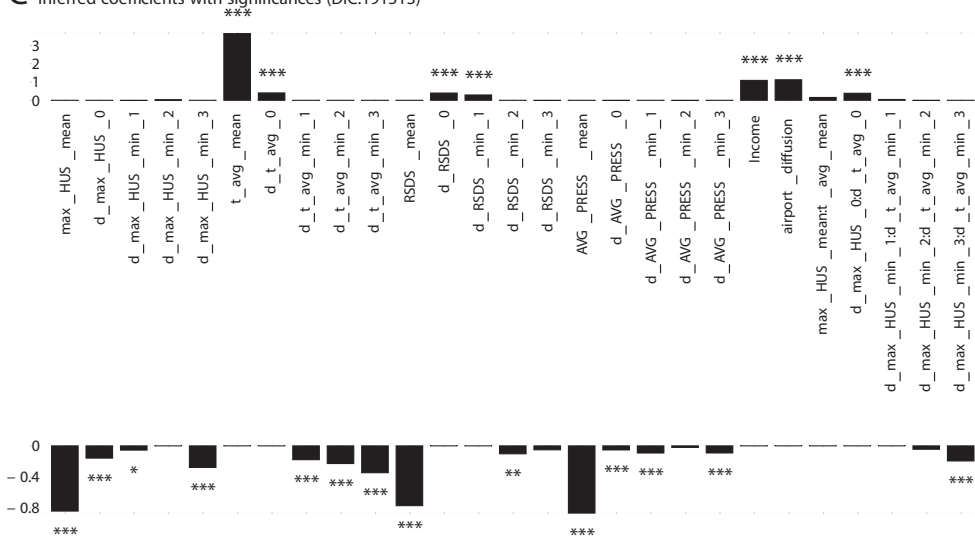

Supplement: supp [file elife_poa_e30756_Figure_1_figure_supplement_2.pdf › elife_poa_e30756_Figure_1_figure_supplement_2.pdf]
