# Supplementary figures and images for: Conjunction of factors triggering waves of seasonal influenza
Source: eLife journal article supplement (doi:10.7554/elife.30756), 2018-02-26

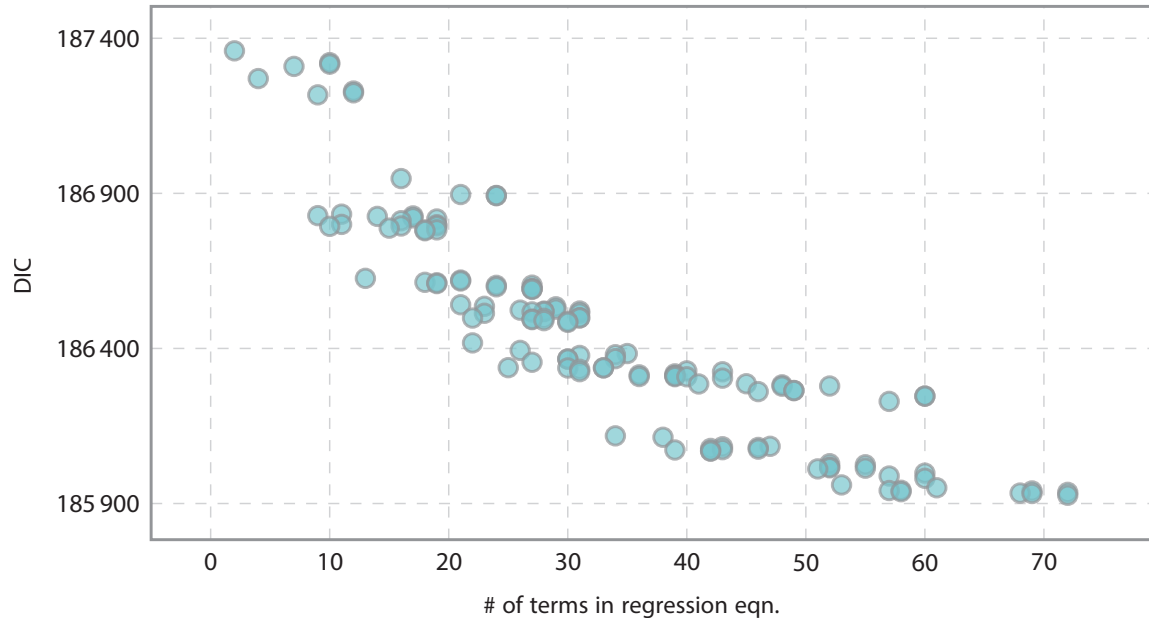

Supplement: supp [file elife_poa_e30756_Figure_1_figure_supplement_6.pdf › elife_poa_e30756_Figure_1_figure_supplement_6.pdf]
